# Supplementary material
Source: PubMed Central journal article supplement (PMC2888556)

Fig. S1. Master two-dimensional gel image for A. epaulette shark cerebellum and B. rectal gland, formed by warping and fusing all individual gel images together in Delta 2D software. Protein mixtures were separated by isoelectric point (pH 3-10 nonlinear) in the horizontal dimension and molecular mass in the vertical dimension. Labels identify the the proteins whose abundance changed significantly following episodic anoxia or hypoxia, as determined from t-test and/or variable importance in the projection analyses (see Tables 4 and 5 and Supplemental Material, Tables S4 and S5).

A.

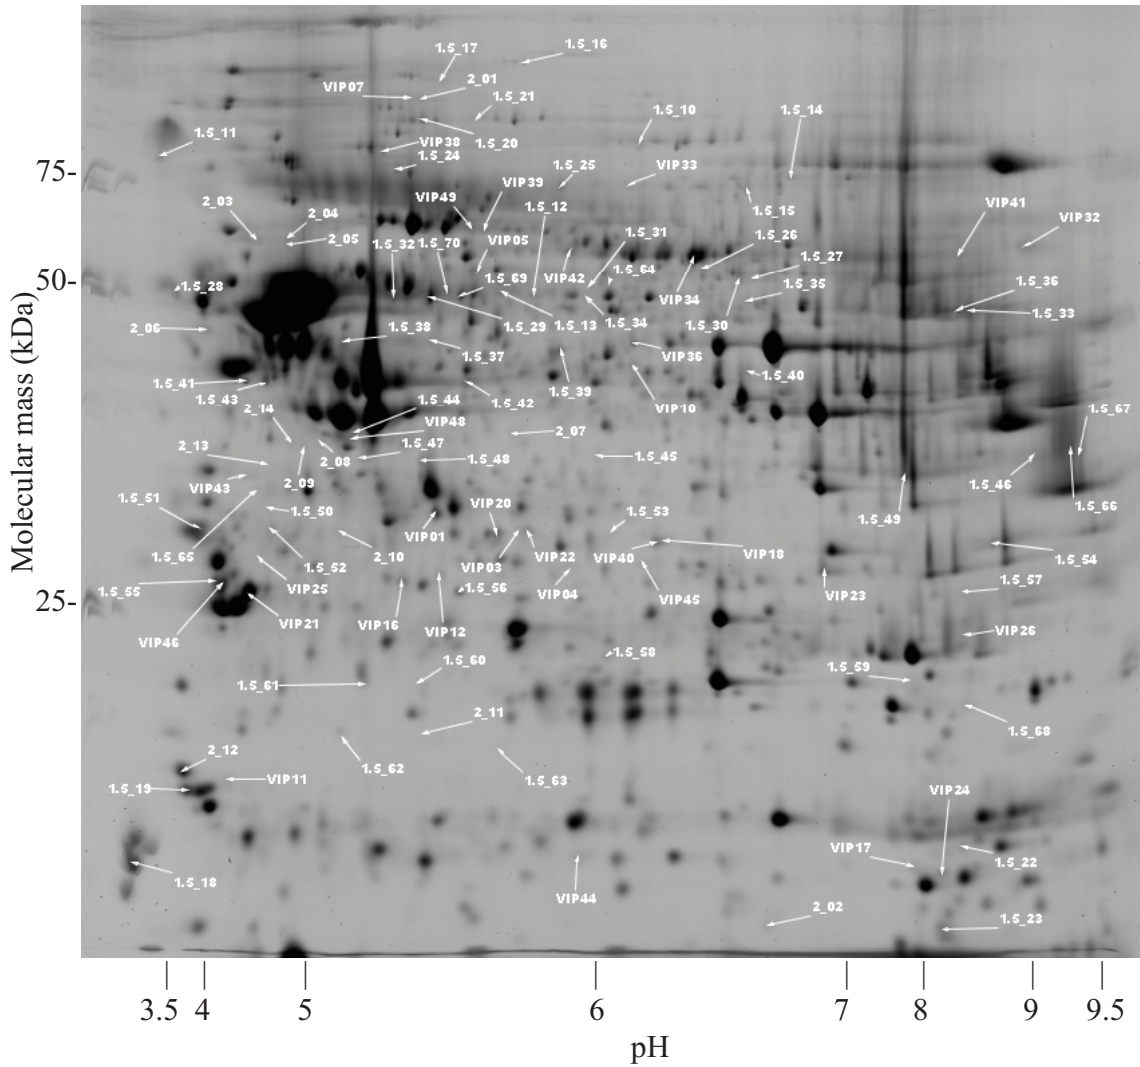

B.

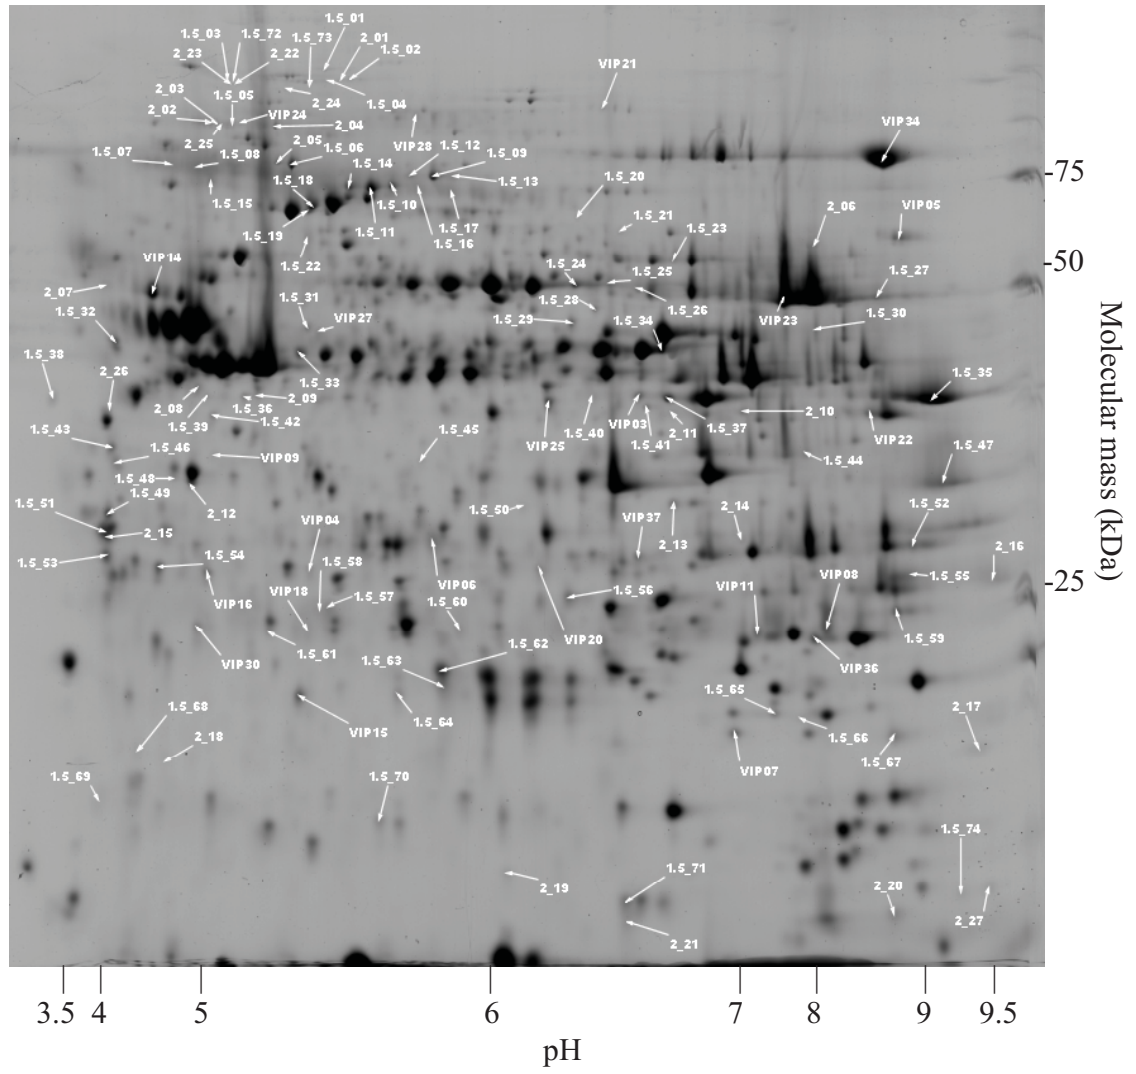

Fig. S2. Results of 200 permutations of the reduced epaulette shark PLS-DA models for A. cerebellum and B. rectal gland, in which the samples were randomly reassigned to the four treatments.  $R^2$  represents the proportion of the variation in the protein expression dataset explained by the model, while  $Q^2$  is a measure of the predictive ability of the model to assign a sample to a given treatment based on the expression pattern. The x-axis represents the correlation of the permuted dataset to the original dataset (for the original dataset  $x=1.0$ ). In both tissues the reduced PLS-DA models perform far better than expected by chance (i.e., high relative  $Q^2$  at  $x$ -axis=1).

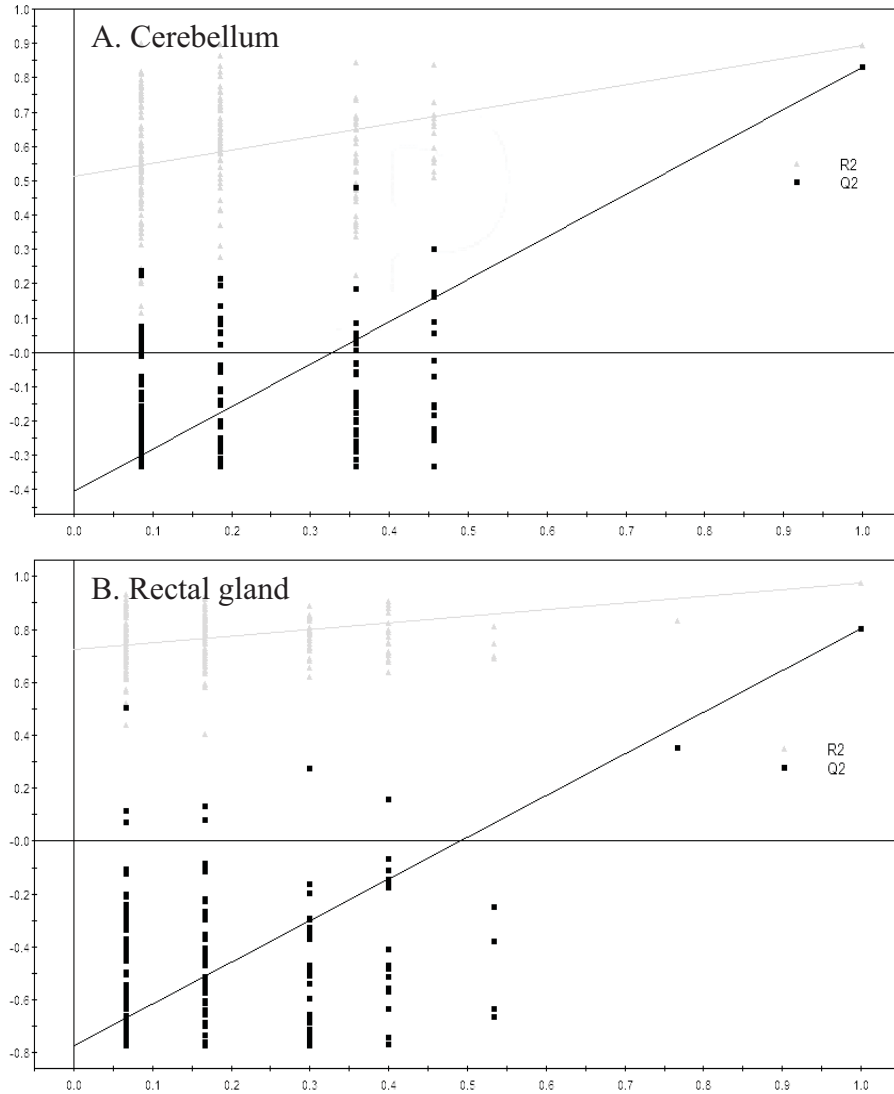

Fig. S3. (next page) Epaulette shark cerebellum master molecular interaction network generated by analysis in IPA software. Gray boxes represent proteins up- or downregulated following one or more experimental treatments. Bar charts adjacent to these boxes indicate relative expression level (relative to controls C1+24 h) for A1+24 h, H1+24 h, and H1+H2+24 h (left to right; red = upregulated, green = downregulated), regardless of statistical significance. Abbreviations for identified proteins as in Table 4. Key emergent nodes in the network: HTT=huntingtin; SLC2A4=solute carrier family 2 (facilitated glucose transporter), member 4; HNF4A=hepatocyte nuclear factor 4, alpha; TP53=tumor protein p53; PPARGC1A=peroxisome proliferator-activated receptor gamma, coactivator 1 alpha.

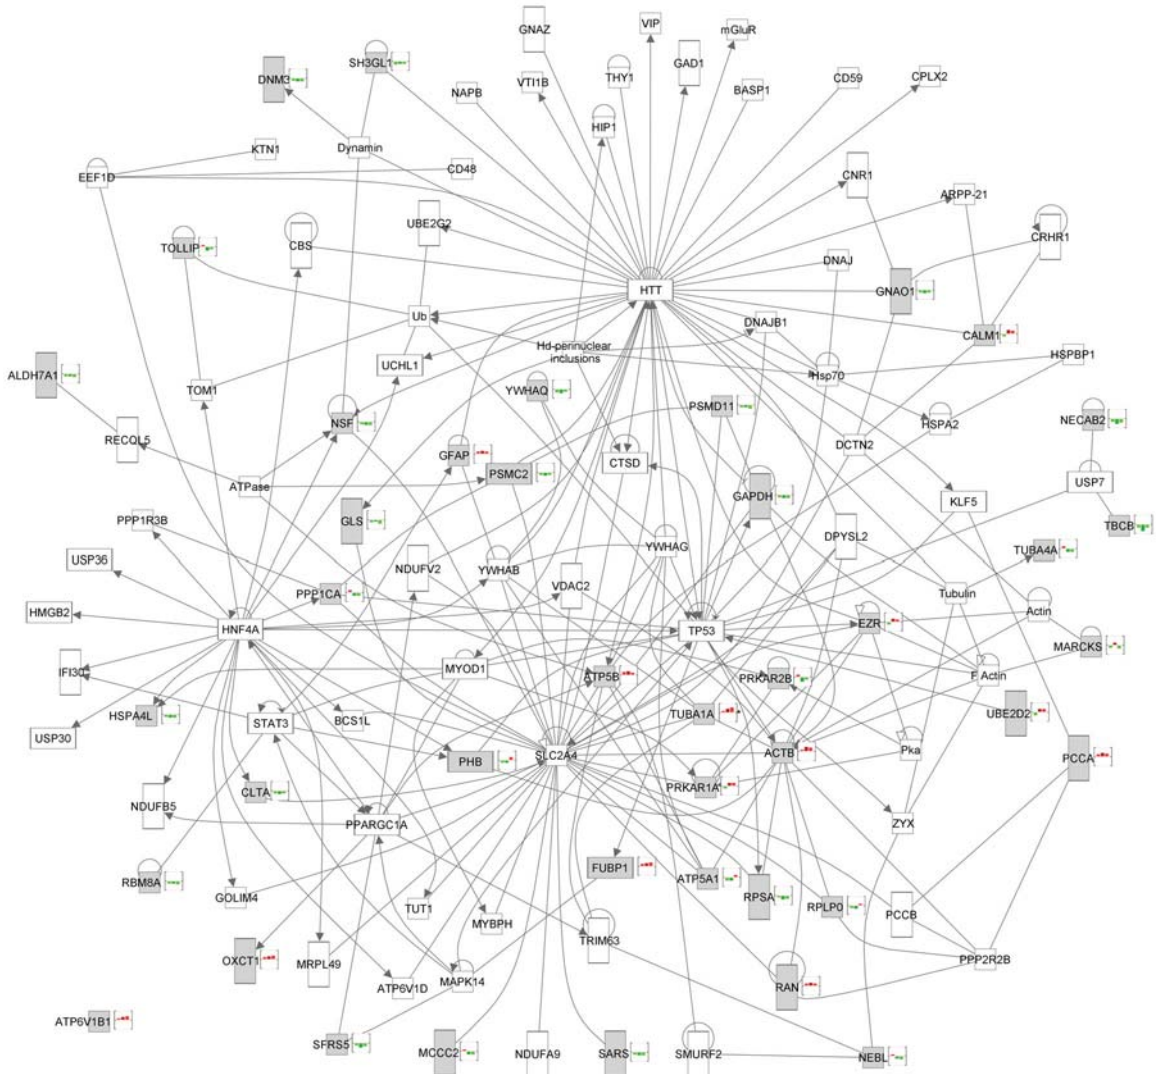

Fig. S4. (next page) Epaulette shark rectal gland master molecular interaction network generated by analysis in IPA software. Gray boxes represent proteins up- or downregulated following one or more experimental treatments. Bar charts adjacent to these boxes indicate relative expression level (relative to controls C1+24 h) for A1+24 h, H1+24 h, and H1+H2+24 h (left to right; red = upregulated, green = downregulated), regardless of statistical significance. Abbreviations for identified proteins as in Table 5. Key emergent nodes in the network: HTT=huntingtin; SLC2A4=solute carrier family 2 (facilitated glucose transporter), member 4; HNF4A=hepatocyte nuclear factor 4, alpha; GRIN2B=glutamate receptor, ionotropic, N-methyl D-aspartate 2B; EGFR=epidermal growth factor receptor (erythroblastic leukemia viral (v-erb-b) oncogene homolog, avian); PPARGC1A=peroxisome proliferator-activated receptor gamma, coactivator 1 alpha.



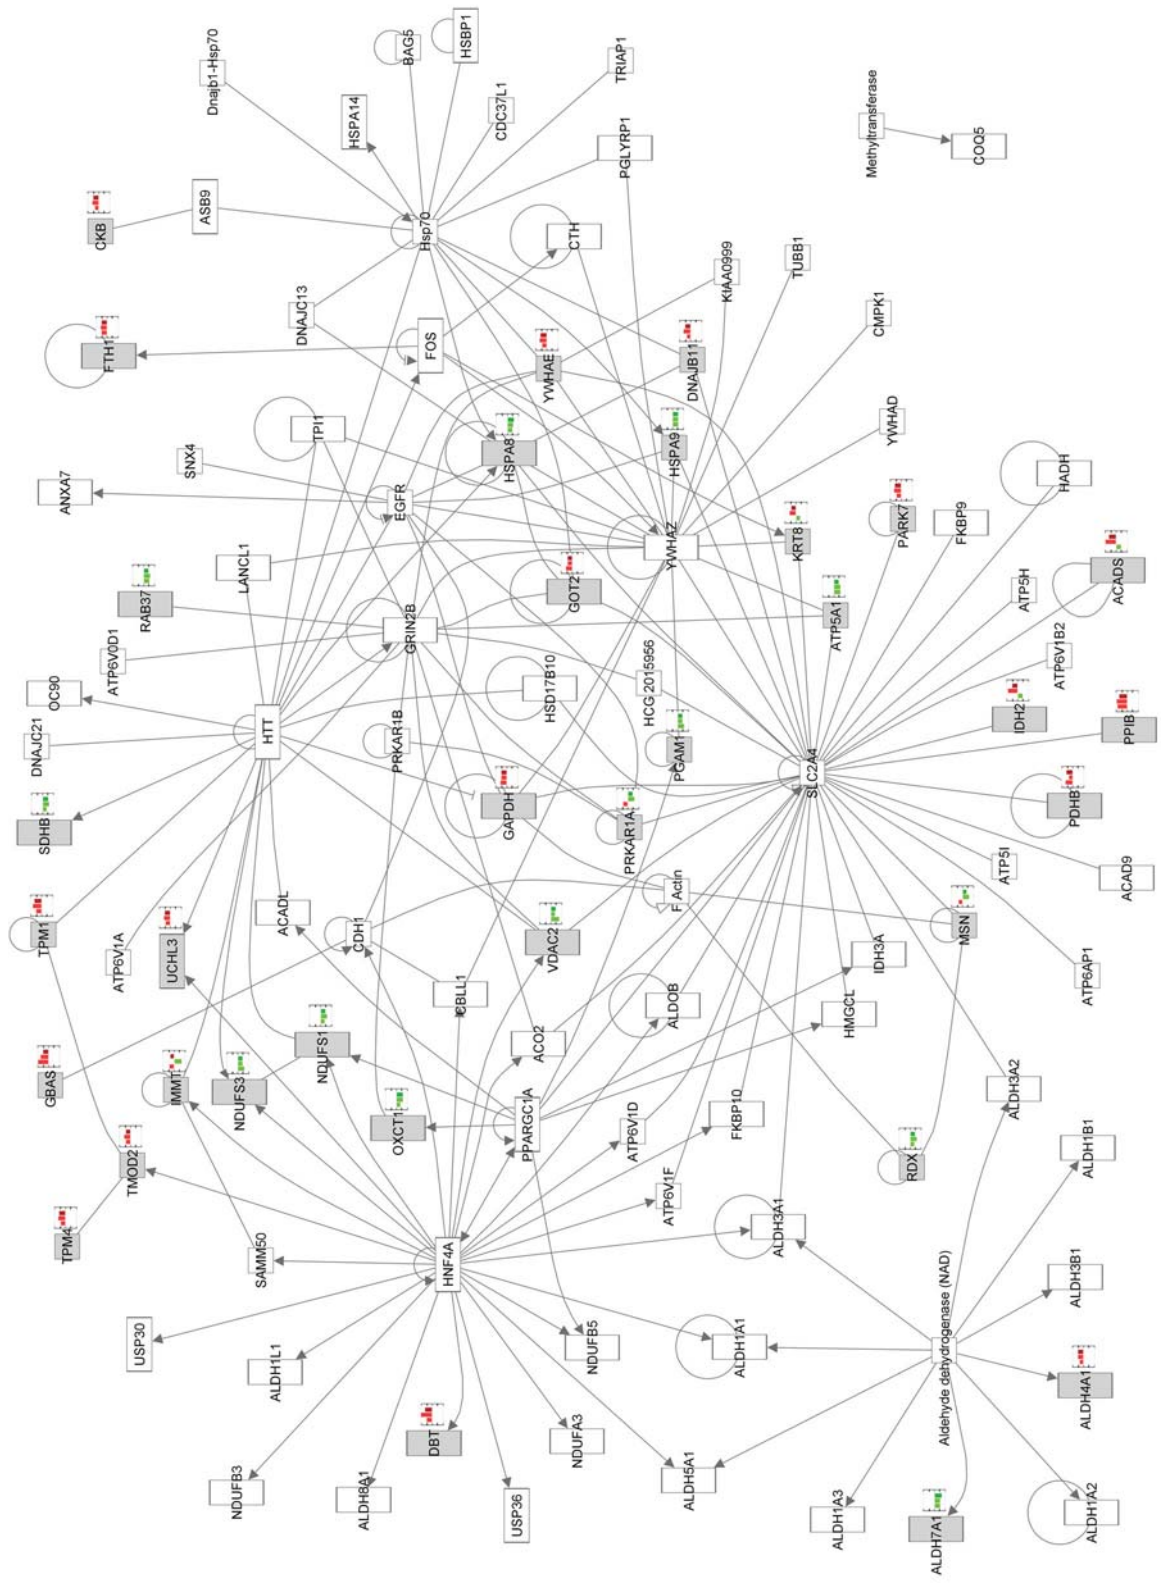

Supplement: 00176.2009_1.pdf [file 00176.2009_1.pdf]
