# Supplementary material
Source: PubMed Central journal article supplement (PMC2888556)
Supplement: 00176.2009_2.pdf [file 00176.2009_2.pdf]

Table S1. Mass spectrometry-based protein identifications and scores for epaulette shark cerebellum proteins that were regulated in response to episodic anoxia or hypoxia. Data from both post-source decay (PSD) and collision-induced dissociation (CID) MS/MS peptide fragmentation modes were searched against the NCBI non-redundant sequence database (chordates). Sequence coverage for peptide mass fingerprint spectra (% of overall sequence) are shown in parentheses for Mascot matches. The numbers of de novo sequences from MS/MS spectra that matched the protein in PEAKS Studio v4.5 searches are shown in parentheses after PEAKS scores.

| Spot                                                          | VIP   | VIP score | Protein identification                                                                      | Abbrev. | Mascot Scores |          | PEAKS Scores |         |  |
|---------------------------------------------------------------|-------|-----------|---------------------------------------------------------------------------------------------|---------|---------------|----------|--------------|---------|--|
|                                                               |       |           |                                                                                             |         | PSD           | CID      | PSD          | CID     |  |
| <b>a) Energy producing processes</b>                          |       |           |                                                                                             |         |               |          |              |         |  |
| <b>i) Glycolysis</b>                                          |       |           |                                                                                             |         |               |          |              |         |  |
| 1.5-66                                                        |       |           | Glyceraldehyde-3-phosphate dehydrogenase (GAPDH) ( <i>Paralichthys olivaceus</i> )          | GAPDH   | 66 (8)        | 42 (8)   | 29 (4)       | 26 (2)  |  |
| <b>ii) Oxidative phosphorylation/electron transport chain</b> |       |           |                                                                                             |         |               |          |              |         |  |
| 1.5-33                                                        | VIP06 | 1.69      | mitochondrial ATP synthase alpha-subunit ( <i>Cyprinus carpio</i> )                         | ATP5A1  | 94 (3)        |          | 85 (3)       | 30 (2)  |  |
| 1.5-36                                                        | VIP08 | 1.68      | ATP synthase subunit alpha ( <i>Larus ridibundus</i> )                                      | ATP5A1  | 72 (20)       |          | 40 (4)       | 29 (2)  |  |
| 1.5-38                                                        |       |           | mitochondrial ATP synthase, H+ transporting F1 complex beta subunit ( <i>Mus musculus</i> ) | ATP5B   | 154 (8)       | 165 (12) | 99 (4)       | 95 (4)  |  |
|                                                               | VIP16 | 1.59      | NADH dehydrogenase flavoprotein 2, 24 kDa subunit                                           | NDUFV2  | 88 (9)        |          | 98 (3)       |         |  |
| <b>iii) Oxidative substrate switching</b>                     |       |           |                                                                                             |         |               |          |              |         |  |
| 1.5-64                                                        |       |           | 3-oxoacid CoA transferase 1 precursor ( <i>Homo sapiens</i> )                               | OXCT1   | 66 (6)        | 47 (6)   | 67 (2)       | 13 (1)  |  |
| 1.5-26                                                        |       |           | methylcrotonoyl-Coenzyme A carboxylase 2 (beta) ( <i>Homo sapiens</i> )                     | MCCC2   |               | 80 (4)   | 11 (2)       | 99 (2)  |  |
| 1.5-31                                                        |       |           | propionyl-CoA carboxylase ( <i>Xenopus laevis</i> )                                         | PCCA    | 145 (5)       | 142 (12) | 96 (3)       | 99 (3)  |  |
| <b>iv) Intracellular movement of energetic equivalents</b>    |       |           |                                                                                             |         |               |          |              |         |  |
|                                                               | VIP04 | 1.73      | Voltage-dependent anion-selective channel protein 2 ( <i>Xenopus laevis</i> )               | VDAC2   | 49 (8)        | 36 (2)   |              | 85 (2)  |  |
|                                                               | VIP23 | 1.56      | Voltage-dependent anion-selective channel protein 2 ( <i>Squalus acanthias</i> )            | VDAC2   | 87 (8)        | 49 (2)   | 97 (3)       | 90 (3)  |  |
| <b>b) Energy consuming processes</b>                          |       |           |                                                                                             |         |               |          |              |         |  |
| <b>i) Proteolysis in proteasome</b>                           |       |           |                                                                                             |         |               |          |              |         |  |
| 1.5-39                                                        |       |           | proteasome 26S ATPase subunit 2 ( <i>Homo sapiens</i> )                                     | PSMC2   | 302 (19)      | 502 (24) | 99 (10)      | 99 (10) |  |
| 1.5-40                                                        | VIP19 | 1.56      | proteasome 26S non-ATPase subunit 11                                                        | PSMD11  |               | 362 (20) | 48 (2)       | 99 (7)  |  |

| Spot                                                                  | VIP   | VIP score | Protein identification                                                                    | Abbrev.  | Mascot Scores |          | PEAKS Scores |        |
|-----------------------------------------------------------------------|-------|-----------|-------------------------------------------------------------------------------------------|----------|---------------|----------|--------------|--------|
|                                                                       |       |           |                                                                                           |          | PSD           | CID      | PSD          | CID    |
| <b>ii) Lysosome</b>                                                   |       |           |                                                                                           |          |               |          |              |        |
| 1.5-29                                                                |       |           | H <sup>+</sup> -ATPase beta 1 subunit, lysosomal                                          | ATP6VIB1 | 44 (3)        | 44 (2)   | 19 (2)       |        |
| <b>iii) Transcription and mRNA processing</b>                         |       |           |                                                                                           |          |               |          |              |        |
| 2-7                                                                   |       |           | splicing factor, arginine/serine-rich 5a ( <i>Danio rerio</i> )                           | SFRS5    | 40 (5)        | 93 (2)   |              |        |
| 1.5-62                                                                |       |           | RNA binding motif protein 8A ( <i>Danio rerio</i> )                                       | RBM8A    | 90 (22)       | 134 (28) | 95 (6)       |        |
| <b>iv) Translation</b>                                                |       |           |                                                                                           |          |               |          |              |        |
| 1.5-30                                                                |       |           | seryl tRNA synthetase ( <i>Danio rerio</i> )                                              | SARS     | 32 (2)        | 94 (2)   | 97 (3)       |        |
| 1.5-48                                                                |       |           | acidic ribosomal phosphoprotein PO ( <i>Bos taurus</i> )                                  | RPLP0    | 62 (3)        | 382 (17) | 99 (3)       | 99 (6) |
| VIP43                                                                 | 1.48  |           | elongation factor 1-delta ( <i>Tetraodon nigroviridis</i> )                               | EEF1D    | 34 (4)        | 64 (2)   |              |        |
| <b>c) Apoptosis and cell cycle</b>                                    |       |           |                                                                                           |          |               |          |              |        |
| 1.5-14                                                                |       |           | far upstream element-binding protein ( <i>Homo sapiens</i> )                              | FUBP1    | 178 (5)       | 87 (3)   | 99 (4)       | 93 (3) |
| 1.5-23                                                                | VIP28 | 1.53      | ubiquitin-conjugating enzyme E2D 2 isoform 1 ( <i>Homo sapiens</i> )                      | UBE2D2   | 94 (18)       | 108 (16) | 93 (4)       | 84 (4) |
| 1.5-45                                                                |       |           | Protein phosphatase 1 alpha ( <i>Danio rerio</i> )                                        | PPP1CA   |               | 102 (14) | 74 (4)       | 68 (4) |
| 1.5-58                                                                |       |           | Ras-related nuclear protein ( <i>Ictalurus punctatus</i> )                                | RAN      | 45 (10)       | 30 (8)   | 97 (3)       |        |
| VIP26                                                                 | 1.54  |           | high mobility group box 2 ( <i>Mus musculus</i> )                                         | HMGB2    |               | 39 (3)   |              | 75 (2) |
| <b>d) Neurotransmitters</b>                                           |       |           |                                                                                           |          |               |          |              |        |
| <b>i) Glutamate synthesis/degradation</b>                             |       |           |                                                                                           |          |               |          |              |        |
| 1.5-27                                                                |       |           | glutaminase ( <i>Rattus norvegicus</i> )                                                  | GLS      | 99 (5)        | 95 (5)   |              |        |
| <b>ii) Receptor processing, vesicle fusion (exo- and endocytosis)</b> |       |           |                                                                                           |          |               |          |              |        |
| 1.5-15                                                                |       |           | N-ethylmaleimide sensitive fusion protein ( <i>Cricetulus longicaudatus</i> )             | NSF      | 160 (7)       | 38 (3)   | 99 (6)       | 53 (3) |
| VIP01                                                                 | 1.92  |           | N-ethylmaleimide sensitive fusion protein attachment protein beta ( <i>Mus musculus</i> ) | NAPB     |               | 35 (2)   | 90 (1)       | 84 (1) |
| 1.5-44                                                                |       |           | SH3 domain-containing Grb-2-like protein ( <i>Xenopus tropicalis</i> )                    | SH3GL1   | 120 (8)       | 207 (11) | 45 (1)       | 99 (5) |
| 1.5-51                                                                | VIP09 | 1.67      | clathrin light-chain B isoform 1 ( <i>Monodelphis domestica</i> )                         | CLTA     | 83 (7)        | 95 (7)   | 41 (3)       | 88 (4) |
| VIP34                                                                 | 1.51  |           | dihydropyrimidinase-like 2 ( <i>Danio rerio</i> )/collapsin response mediator protein-1A  | DPYSL2   | 53 (1)        | 60 (4)   | 41 (2)       | 90 (1) |
| 1.5-52                                                                |       |           | toll interacting protein ( <i>Xenopus tropicalis</i> )                                    | TOLLIP   |               | 45 (5)   |              | 52 (2) |

| Spot                                                  | VIP   | VIP score | Protein identification                                                                             | Abbrev. | Mascot Scores |          | PEAKS Scores |         |
|-------------------------------------------------------|-------|-----------|----------------------------------------------------------------------------------------------------|---------|---------------|----------|--------------|---------|
|                                                       |       |           |                                                                                                    |         | PSD           | CID      | PSD          | CID     |
| <b>e) Ca<sup>2+</sup> binding</b>                     |       |           |                                                                                                    |         |               |          |              |         |
| 2-14                                                  |       |           | novel protein similar to vertebrate EF hand calcium binding protein 2 ( <i>Danio rerio</i> )       | NECAB2  | 97 (4)        | 110 (6)  | 93 (4)       | 99 (3)  |
| 1.5-18                                                | VIP31 | 1.52      | calmodulin ( <i>Clemmys japonica</i> )                                                             | CALM1   | 85 (39)       | 87 (22)  | 86 (3)       | 54 (2)  |
| <b>f) Molecular chaperones</b>                        |       |           |                                                                                                    |         |               |          |              |         |
| 1.5-20                                                |       |           | heat shock 70kDa protein 4-like (unnamed protein product, <i>Tetraodon nigroviridis</i> )          | HSPA4L  | 60 (2)        | 47 (3)   | 93 (3)       |         |
|                                                       | VIP03 | 1.74      | Chain A, dimerization and U-box domains of zebrafish c-terminal of HSP70 interacting protein       | HSPBP1  | 119 (9)       | 136 (9)  |              | 95 (3)  |
| 1.5-56                                                |       |           | prohibitin ( <i>Equus caballus</i> )                                                               | PHB     | 36 (8)        |          | 76 (2)       | 20 (2)  |
| <b>g) Cytoskeleton</b>                                |       |           |                                                                                                    |         |               |          |              |         |
| <b>i) Microtubular skeleton</b>                       |       |           |                                                                                                    |         |               |          |              |         |
| 2-4                                                   | VIP47 | 1.47      | alpha tubulin ( <i>Gillichthys mirabilis</i> )                                                     | TUBA1A  | 248 (15)      | 266 (15) | 98 (5)       | 99 (5)  |
| 2-5                                                   |       |           | alpha tubulin ( <i>Gillichthys mirabilis</i> )                                                     | TUBA1A  | 201 (18)      |          | 99 (5)       |         |
| 1.5-12                                                |       |           | alpha tubulin                                                                                      | TUBA1A  | 151 (15)      | 245 (20) | 99 (7)       | 99 (6)  |
| 1.5-13                                                | VIP27 | 1.54      | alpha tubulin subunit ( <i>Oncorhynchus nerka</i> )                                                | TUBA1A  | 262 (16)      | 279 (20) | 99 (6)       | 99 (6)  |
| 1.5-28                                                |       |           | alpha tubulin                                                                                      | TUBA1A  | 52 (3)        |          | 72 (2)       |         |
| 1.5-32                                                |       |           | alpha tubulin                                                                                      | TUBA1A  | 563 (28)      | 616 (31) | 99 (11)      | 99 (11) |
| 1.5-34                                                |       |           | alpha tubulin                                                                                      | TUBA1A  | 83 (14)       | 43 (3)   | 76 (2)       |         |
| 1.5-70                                                |       |           | tubulin alpha                                                                                      | TUBA1A  | 73 (5)        | 137 (5)  | 63 (1)       | 97 (4)  |
| 1.5-50                                                |       |           | alpha 4 tubulin                                                                                    | TUBA4A  | 164 (16)      |          | 83 (6)       |         |
| 2-9                                                   |       |           | tubulin folding cofactor B (Cytoskeleton-associated protein 1) (LOC735205, <i>Xenopus laevis</i> ) | TBCB    |               | 56 (4)   |              | 55 (1)  |
| <b>ii) Actin cytoskeleton and dendrite morphology</b> |       |           |                                                                                                    |         |               |          |              |         |
| 1.5-42                                                |       |           | beta actin                                                                                         | ACTB    | 31 (5)        |          | 66 (4)       | 27 (3)  |
| 1.5-11                                                |       |           | marcks (myristoylated alanine-rich C-kinase substrate) calmodulin binding domain protein           | MARCKS  | 48 (2)        | 29 (2)   | 89 (1)       | 55 (1)  |
| 1.5-10                                                |       |           | dynammin 3                                                                                         | DNM3    | 93 (5)        | 52 (3)   |              | 79 (4)  |
| <b>iii) Intermediate filaments</b>                    |       |           |                                                                                                    |         |               |          |              |         |
| 1.5-41                                                |       |           | glial fibrillary acidic protein ( <i>Mus musculus</i> )                                            | GFAP    |               | 49 (1)   | 76 (3)       | 85 (2)  |

| Spot                                                         | VIP   | VIP score | Protein identification                                                                                                 | Abbrev. | Mascot Scores |          | PEAKS Scores |        |
|--------------------------------------------------------------|-------|-----------|------------------------------------------------------------------------------------------------------------------------|---------|---------------|----------|--------------|--------|
|                                                              |       |           |                                                                                                                        |         | PSD           | CID      | PSD          | CID    |
| <b>iv) Cytoskeleton anchoring</b>                            |       |           |                                                                                                                        |         |               |          |              |        |
| 1.5-25                                                       | VIP35 | 1.51      | ezrin                                                                                                                  | EZR     | 127 (3)       | 136 (7)  | 79 (3)       |        |
| 1.5-54                                                       |       |           | nebulette ( <i>Homo sapiens</i> )                                                                                      | NEBL    | 36 (5)        |          | 87 (1)       | 99 (2) |
| 1.5-43                                                       |       |           | Ribosomal protein SA (laminin-binding protein) ( <i>Homo sapiens</i> )                                                 | RPSA    | 183 (17)      | 184 (13) | 99 (3)       | 99 (4) |
| <b>h) Signalling pathways</b>                                |       |           |                                                                                                                        |         |               |          |              |        |
| <b>i) cAMP dependent protein kinase (PKA)</b>                |       |           |                                                                                                                        |         |               |          |              |        |
| 2-6                                                          |       |           | cAMP-dependent protein kinase type II-beta regulatory subunit isoform 1 ( <i>Canis familiaris</i> )                    | PRKAR2B | 38 (6)        |          | 76 (2)       |        |
| 1.5-37                                                       |       |           | cAMP-dependent protein kinase type I-alpha regulatory subunit ( <i>Mus musculus</i> )                                  | PRKAR1A | 86 (3)        | 27 (3)   |              |        |
| <b>ii) 14-3-3 mediated phosphoprotein adapter signalling</b> |       |           |                                                                                                                        |         |               |          |              |        |
| 1.5-55                                                       | VIP15 | 1.60      | 14-3-3 theta ( <i>Danio rerio</i> )                                                                                    | YWHAQ   | 117 (11)      | 149 (11) | 96 (4)       | 98 (4) |
|                                                              | VIP21 | 1.56      | 3-monooxygenase/tryptophan 5-monooxygenase activation protein, gamma polypeptide (14-3-3 gamma) ( <i>Danio rerio</i> ) | YWHAG   | 215 (21)      | 139 (19) | 99 (7)       | 94 (5) |
|                                                              | VIP46 | 1.47      | 14-3-3 beta ( <i>Tetraodon nigroviridis</i> )                                                                          | YWHAB   | 48 (4)        |          | 91 (2)       | 90 (1) |
| <b>iii) G protein coupled receptors</b>                      |       |           |                                                                                                                        |         |               |          |              |        |
| 1.5-47                                                       |       |           | guanine nucleotide binding protein G(o), alpha subunit ( <i>Salmo salar</i> )                                          | GNAO1   | 31 (13)       | 76 (9)   | 86 (2)       | 63 (3) |
| <b>i) ROS/oxidative stress</b>                               |       |           |                                                                                                                        |         |               |          |              |        |
| 1.5-35                                                       |       |           | Aldehyde dehydrogenase 7 family, member A1 ( <i>Monodelphis domestica</i> )                                            | ALDH7A1 | 100 (4)       | 55 (3)   | 81 (2)       | 66 (2) |
| <b>j) Unannotated</b>                                        |       |           |                                                                                                                        |         |               |          |              |        |
| 2-2                                                          | VIP29 | 1.53      | novel protein (zgc:92871) ( <i>Danio rerio</i> )                                                                       |         | 90 (15)       | 82 (15)  | 91 (2)       |        |

Table S2. Significantly overrepresented pathways in the epaulette shark cerebellum and rectal gland proteomics datasets, identified with Ingenuity Pathways Analysis software. The *p* values were corrected for multiple testing using the method of Benjamini and Hochberg (3). Abbreviations as in Tables 4 and 5.

| Treatment                       | Ingenuity Canonical Pathway                           | p <sub>BH</sub> | Molecules                   |
|---------------------------------|-------------------------------------------------------|-----------------|-----------------------------|
| <b>Cerebellum</b>               |                                                       |                 |                             |
| <b>A1+24</b>                    | Mitochondrial Dysfunction                             | 0.044           | ATP5A1                      |
|                                 | Oxidative Phosphorylation                             | 0.044           | ATP5A1                      |
| <b>H1+24</b>                    | Melatonin Signaling                                   | 0.010           | PRKAR2B, GNAO1, CALM1       |
|                                 | Synaptic Long Term Potentiation                       | 0.010           | PRKAR2B, PPP1CA, CALM1      |
|                                 | 14-3-3-mediated Signaling                             | 0.010           | YWHAQ, TUBA4A, GFAP         |
|                                 | Corticotropin Releasing Hormone Signaling             | 0.010           | PRKAR2B, GNAO1, CALM1       |
|                                 | Androgen Signaling                                    | 0.010           | PRKAR2B, GNAO1, CALM1       |
|                                 | cAMP-mediated Signaling                               | 0.017           | PRKAR2B, GNAO1, CALM1       |
|                                 | CREB Signaling in Neurons                             | 0.018           | PRKAR2B, GNAO1, CALM1       |
|                                 | ERK/MAPK Signaling                                    | 0.019           | YWHAQ, PRKAR2B, PPP1CA      |
|                                 | Cardiac Hypertrophy Signaling                         | 0.030           | PRKAR2B, GNAO1, CALM1       |
|                                 | Valine, Leucine and Isoleucine Degradation            | 0.030           | OXCT1, MCCC2                |
|                                 | Nitric Oxide Signaling in the Cardiovascular System   | 0.030           | PRKAR2B, CALM1              |
|                                 | Dopamine Receptor Signaling                           | 0.030           | PRKAR2B, PPP1CA             |
|                                 | Chemokine Signaling                                   | 0.030           | PPP1CA, CALM1               |
|                                 | CDK5 Signaling                                        | 0.037           | PRKAR2B, PPP1CA             |
|                                 | IGF-1 Signaling                                       | 0.037           | YWHAQ, PRKAR2B              |
| α-Adrenergic Signaling          | 0.037                                                 | PRKAR2B, CALM1  |                             |
| <b>H1+H2+24</b>                 | Valine, Leucine and Isoleucine Degradation            | 0.007           | PCCA, ALDH7A1, MCCC2        |
|                                 | Huntington's Disease Signaling                        | 0.047           | NSF, GLS, DNM3              |
|                                 | Glutamate Receptor Signaling                          | 0.047           | GLS, CALM1                  |
|                                 | Propanoate Metabolism                                 | 0.047           | PCCA, ALDH7A1               |
|                                 | Melatonin Signaling                                   | 0.049           | CALM1, PRKAR1A              |
|                                 | Nitric Oxide Signaling in the Cardiovascular System   | 0.049           | CALM1, PRKAR1A              |
| <b>Rectal gland</b>             |                                                       |                 |                             |
| <b>A1+24</b>                    | Glycolysis/Gluconeogenesis                            | 0.000           | PGAM1, GAPDH, PDHB          |
|                                 | Alanine and Aspartate Metabolism                      | 0.002           | GOT2, PDHB                  |
|                                 | Valine, Leucine and Isoleucine Biosynthesis           | 0.033           | PDHB                        |
|                                 | Phenylalanine, Tyrosine and Tryptophan Biosynthesis   | 0.044           | GOT2                        |
|                                 | Pentose Phosphate Pathway                             | 0.048           | PDHB                        |
|                                 | Glutamate Metabolism                                  | 0.048           | GOT2                        |
|                                 | Phenylalanine Metabolism                              | 0.048           | GOT2                        |
|                                 | Cysteine Metabolism                                   | 0.049           | GOT2                        |
|                                 | Butanoate Metabolism                                  | 0.049           | PDHB                        |
|                                 | Tyrosine Metabolism                                   | 0.049           | GOT2                        |
|                                 | Ubiquinone Biosynthesis                               | 0.049           | NDUFS3                      |
|                                 | Pyruvate Metabolism                                   | 0.049           | PDHB                        |
|                                 | IRF Activ. by Cytosolic Pattern Recognition Receptors | 0.049           | PPIB                        |
| Arginine and Proline Metabolism | 0.050                                                 | GOT2            |                             |
| <b>H1+24</b>                    | Butanoate Metabolism                                  | 0.000           | ALDH4A1, SDHB, OXCT1, ACADS |
|                                 | Valine, Leucine and Isoleucine Degradation            | 0.006           | ALDH4A1, OXCT1, ACADS       |
|                                 | Mitochondrial Dysfunction                             | 0.027           | SDHB, NDUFS1, PARK7         |

|                 |                                                |       |                           |
|-----------------|------------------------------------------------|-------|---------------------------|
|                 | Calcium Signaling                              | 0.036 | TPM1, TPM4, PRKAR1A       |
|                 | NRF2-mediated Oxidative Stress Response        | 0.036 | PPIB, DNAJB11, FTH1       |
|                 | $\beta$ -alanine Metabolism                    | 0.036 | ALDH4A1, ACADS            |
|                 | Huntington's Disease Signaling                 | 0.036 | HSPA8, SDHB, HSPA9        |
|                 | Propanoate Metabolism                          | 0.036 | ALDH4A1, ACADS            |
|                 | Arginine and Proline Metabolism                | 0.045 | CKB, ALDH4A1              |
| <b>H1+H2+24</b> | Butanoate Metabolism                           | 0.000 | OXCT1, DBT, PDHB, ALDH7A1 |
|                 | Valine, Leucine and Isoleucine Degradation     | 0.000 | OXCT1, DBT, ALDH7A1       |
|                 | Histidine Metabolism                           | 0.001 | DBT, ALDH7A1              |
|                 | Pyruvate Metabolism                            | 0.002 | PDHB, ALDH7A1             |
|                 | Glycolysis/Gluconeogenesis                     | 0.002 | PDHB, ALDH7A1             |
|                 | Lysine Degradation                             | 0.005 | DBT, ALDH7A1              |
|                 | Valine, Leucine and Isoleucine Biosynthesis    | 0.014 | PDHB                      |
|                 | Synthesis and Degradation of Ketone Bodies     | 0.017 | OXCT1                     |
|                 | Ascorbate and Aldarate Metabolism              | 0.028 | ALDH7A1                   |
|                 | Glycosphingolipid Biosynthesis - Ganglioseries | 0.029 | DBT                       |
|                 | Pentose Phosphate Pathway                      | 0.030 | PDHB                      |
|                 | Phenylalanine Metabolism                       | 0.032 | DBT                       |
|                 | Alanine and Aspartate Metabolism               | 0.032 | PDHB                      |
|                 | Bile Acid Biosynthesis                         | 0.036 | ALDH7A1                   |
|                 | $\beta$ -alanine Metabolism                    | 0.039 | ALDH7A1                   |
|                 | Propanoate Metabolism                          | 0.039 | ALDH7A1                   |
|                 | Tyrosine Metabolism                            | 0.039 | DBT                       |
|                 | Glycine, Serine and Threonine Metabolism       | 0.039 | DBT                       |
|                 | Arginine and Proline Metabolism                | 0.041 | ALDH7A1                   |
|                 | Aldosterone Signaling in Epithelial Cells      | 0.044 | HSPA8                     |
|                 | Glycerolipid Metabolism                        | 0.046 | ALDH7A1                   |

Table S3. Mass spectrometry-based protein identifications and scores for epaulette shark rectal gland proteins that were regulated in response to episodic anoxia or hypoxia. Data from both post-source decay (PSD) and collision-induced dissociation (CID) MS/MS peptide fragmentation modes were searched against the NCBI non-redundant sequence database (chordates). Sequence coverage for peptide mass fingerprint spectra (% of overall sequence) are shown in parentheses for Mascot matches. The numbers of de novo sequences from MS/MS spectra that matched the protein in PEAKS Studio v4.5 searches are shown in parentheses after PEAKS scores.

| Spot                                                          | VIP   | VIP score | Protein identification                                                                                     | Abbrev. | Mascot Scores |          | PEAKS Scores |        |
|---------------------------------------------------------------|-------|-----------|------------------------------------------------------------------------------------------------------------|---------|---------------|----------|--------------|--------|
|                                                               |       |           |                                                                                                            |         | PSD           | CID      | PSD          | CID    |
| <b>a) Energy producing processes</b>                          |       |           |                                                                                                            |         |               |          |              |        |
| <b>i) Glycolysis</b>                                          |       |           |                                                                                                            |         |               |          |              |        |
|                                                               | VIP22 | 1.46      | aldolase B ( <i>Equus caballus</i> )                                                                       | ALDOB   | 32 (1)        |          | 55 (2)       |        |
|                                                               | VIP11 | 1.57      | triose phosphate isomerase ( <i>Xiphophorus maculatus</i> )                                                | TPH1    | 95 (52)       |          |              |        |
| 1.5-47                                                        |       |           | glyceraldehyde-3-phosphate dehydrogenase ( <i>Paralichthys olivaceus</i> )                                 | GAPDH   | 34 (4)        |          | 22 (4)       | 47 (1) |
| 1.5-60                                                        |       |           | phosphoglycerate mutase 1 ( <i>Gallus gallus</i> )                                                         | PGAMI   | 100 (8)       | 150 (8)  | 96 (3)       | 99 (2) |
| <b>ii) Pyruvate dehydrogenase complex</b>                     |       |           |                                                                                                            |         |               |          |              |        |
| 2-12                                                          | VIP13 | 1.54      | pyruvate dehydrogenase (lipoamide) beta ( <i>Danio rerio</i> )                                             | PDHB    | 107 (8)       |          | 93 (4)       |        |
| 1.5-48                                                        | VIP17 | 1.51      | pyruvate dehydrogenase (lipoamide) beta ( <i>Danio rerio</i> )                                             | PDHB    | 95 (4)        | 60 (6)   | 98 (3)       | 95 (3) |
| 1.5-28                                                        |       |           | dihydrolipoamide branched chain transacylase E2 ( <i>Taeniopygia guttata</i> )                             | DBT     | 76 (4)        | 133 (5)  | 99 (4)       | 89 (9) |
| <b>iii) TCA cycle</b>                                         |       |           |                                                                                                            |         |               |          |              |        |
| 2-14                                                          |       |           | isocitrate dehydrogenase 2 (NADP+), mitochondrial                                                          | IDH2    |               | 76 (7)   |              | 81 (3) |
| <b>iv) Oxidative phosphorylation/electron transport chain</b> |       |           |                                                                                                            |         |               |          |              |        |
| 2-6                                                           |       |           | ATP synthase subunit alpha, mitochondrial precursor ( <i>Salmo salar</i> )                                 | ATP5A1  | 57 (4)        | 498 (23) | 49 (4)       | 99 (9) |
| 1.5-27                                                        |       |           | mitochondrial ATP synthase alpha subunit ( <i>Scyliorhinus canicula</i> )                                  | ATP5A1  | 281 (19)      | 201 (10) | 99 (9)       | 99 (5) |
|                                                               | VIP23 | 1.44      | ATP synthase, H+ transporting, mitochondrial F1 complex, alpha subunit ( <i>Danio rerio</i> )              | ATP5A1  | 586 (23)      | 374 (18) | 99 (9)       | 99 (9) |
| 1.5-10                                                        |       |           | NADH dehydrogenase (ubiquinone) Fe-S protein 1 ( <i>Danio rerio</i> )                                      | NDUFS1  | 24 (2)        | 33 (1)   | 78 (2)       | 22 (2) |
| 1.5-11                                                        |       |           | NADH dehydrogenase (ubiquinone) Fe-S protein 1, 75kDa (NADH-coenzyme Q reductase) ( <i>Gallus gallus</i> ) | NDUFS1  | 191 (5)       | 102 (2)  | 99 (5)       | 90 (2) |
| 1.5-14                                                        |       |           | NADH dehydrogenase (ubiquinone) Fe-S protein 1, 75kDa (NADH-coenzyme Q reductase) ( <i>Gallus gallus</i> ) | NDUFS1  | 99 (4)        | 85 (2)   | 93 (3)       | 99 (4) |
| 1.5-54                                                        | VIP10 | 1.57      | similar to NADH dehydrogenase (ubiquinone) Fe-S protein 3, 30kDa (NADH-coenzyme Q reductase)               | NDUFS3  | 175 (9)       | 277 (16) | 99 (3)       | 99 (7) |
| 1.5-55                                                        |       |           | succinate dehydrogenase complex, subunit B, iron sulfur (lp) ( <i>Danio rerio</i> )                        | SDHB    | 75 (4)        | 156 (16) | 58 (3)       | 98 (4) |

| Spot                                                                                                          | VIP score  | VIP Protein identification                                                                   | Abbrev. | Mascot Scores |          | PEAKS Scores |         |
|---------------------------------------------------------------------------------------------------------------|------------|----------------------------------------------------------------------------------------------|---------|---------------|----------|--------------|---------|
|                                                                                                               |            |                                                                                              |         | PSD           | CID      | PSD          | CID     |
| <b>v) Intracellular movement of energetic equivalents (Malate aspartate shuttle, phosphocreatine circuit)</b> |            |                                                                                              |         |               |          |              |         |
| 1.5-35                                                                                                        |            | mitochondrial aspartate aminotransferase                                                     | GOT2    | 35 (4)        | 68 (3)   | 11 (2)       |         |
| 1.5-52                                                                                                        | VIP02 1.67 | voltage-dependent anion channel 2 ( <i>Squalus acanthias</i> )                               | VDAC2   | 89 (5)        | 76 (5)   | 97 (2)       | 95 (3)  |
| 1.5-37                                                                                                        |            | creatine kinase ( <i>Scyltorhinus canicula</i> )                                             | CKB     | 111 (10)      | 42 (7)   | 63 (3)       | 66 (1)  |
| 1.5-41                                                                                                        |            | creatine kinase ( <i>Scyltorhinus canicula</i> )                                             | CKB     | 123 (12)      | 162 (20) | 95 (7)       | 88 (7)  |
| <b>vi) Oxidative substrate switching</b>                                                                      |            |                                                                                              |         |               |          |              |         |
| 1.5-24                                                                                                        | VIP38 1.39 | 3-oxoacid CoA transferase (oxct1) ( <i>Xenopus tropicalis</i> )                              | OXCT1   | 90 (1)        | 115 (4)  | 77 (2)       | 98 (3)  |
|                                                                                                               | VIP37 1.40 | 3-hydroxyacyl-CoA dehydrogenase                                                              | HADH    | 73 (6)        | 87 (8)   | 89 (2)       | 88 (3)  |
| 2-11                                                                                                          |            | acyl-CoA dehydrogenase (EC 1.3.99.3) precursor, short-chain-specific                         | ACADS   | 29 (3)        | 33 (2)   |              | 71 (2)  |
| <b>b) Energy consuming processes</b>                                                                          |            |                                                                                              |         |               |          |              |         |
| <b>i) Proteolysis</b>                                                                                         |            |                                                                                              |         |               |          |              |         |
| 1.5-53                                                                                                        |            | ubiquitin carboxyl-terminal esterase L3 (thioesterase)                                       | UCHL3   |               | 51 (5)   |              | 90 (2)  |
| <b>c) Apoptosis and cell cycle</b>                                                                            |            |                                                                                              |         |               |          |              |         |
|                                                                                                               | VIP07 1.60 | similar to Cytidylylase kinase (UMP-CMP kinase), partial ( <i>Ornithorhynchus anatinus</i> ) | CMPK1   | 53 (5)        | 78 (8)   | 67 (1)       | 90 (2)  |
|                                                                                                               | VIP05 1.63 | Annexin VII                                                                                  | ANXA7   | 71 (3)        | 31 (3)   | 81 (2)       | 66 (1)  |
| <b>d) Vesicles, endocytosis, intracellular trafficking</b>                                                    |            |                                                                                              |         |               |          |              |         |
| 1.5-58                                                                                                        |            | RAB37, member RAS oncogene family ( <i>Homo sapiens</i> )                                    | RAB37   | 31 (8)        | 62 (8)   |              | 99 (2)  |
| 2-16                                                                                                          | VIP29 1.42 | glioblastoma amplified sequence (NipSnap2)                                                   | GBAS    | 84 (6)        | 90 (8)   | 88 (3)       | 79 (3)  |
|                                                                                                               | VIP27 1.42 | sorting nexin 4 ( <i>Homo sapiens</i> )                                                      | SNX4    | 54 (6)        | 44 (3)   | 81 (4)       | 19 (1)  |
| <b>e) Molecular chaperones</b>                                                                                |            |                                                                                              |         |               |          |              |         |
| 2-17                                                                                                          |            | peptidylprolyl isomerase B ( <i>Danio rerio</i> )                                            | PPIB    | 45 (10)       | 135 (25) | 85 (4)       | 81 (5)  |
| 1.5-18                                                                                                        | VIP26 1.43 | heat shock 70kDa protein 9B (75kDa glucose-regulated protein) ( <i>Gallus gallus</i> )       | HSPA9   | 68 (6)        | 73 (6)   | 79 (4)       | 80 (3)  |
| 1.5-19                                                                                                        |            | heat shock cognate 70 kDa ( <i>Carassius auratus</i> )                                       | HSPA8   | 252 (18)      | 231 (13) | 99 (5)       | 99 (8)  |
| 1.5-40                                                                                                        |            | DnaJ (Hsp40) homolog, subfamily B, member 11 ( <i>Homo sapiens</i> )                         | DNAJB11 | 77 (6)        | 34 (2)   | 93 (4)       |         |
| <b>f) Cytoskeleton</b>                                                                                        |            |                                                                                              |         |               |          |              |         |
| <b>i) Microtubular skeleton</b>                                                                               |            |                                                                                              |         |               |          |              |         |
|                                                                                                               | VIP14 1.54 | tubulin beta-1 chain ( <i>Gadus morhua</i> )                                                 | TUBB1   | 295 (17)      | 436 (26) | 99 (11)      | 99 (12) |



| Spot                                                         | VIP score | VIP Protein identification                                                                               | Abbrev. | Mascot Scores |          | PEAKS Scores |        |
|--------------------------------------------------------------|-----------|----------------------------------------------------------------------------------------------------------|---------|---------------|----------|--------------|--------|
|                                                              |           |                                                                                                          |         | PSD           | CID      | PSD          | CID    |
| <b>ii) Actin cytoskeleton</b>                                |           |                                                                                                          |         |               |          |              |        |
| 2-26                                                         |           | tropomyosin ( <i>Takifugu rubripes</i> )                                                                 | TPM1    | 232 (14)      | 286 (28) | 99 (6)       | 99 (9) |
| 1.5-43                                                       |           | fast tropomyosin ( <i>Scyllorhinus retifer</i> )                                                         | TPM1    | 71 (16)       |          | 54 (3)       |        |
| 1.5-49                                                       |           | cytoskeletal tropomyosin 4 ( <i>Coturnix coturnix</i> )                                                  | TPM4    | 61 (4)        | 180 (24) | 91 (2)       | 87 (7) |
| 1.5-36                                                       |           | tropomodulin 2 ( <i>Danio rerio</i> )                                                                    | TMOD2   | 138 (9)       | 174 (10) | 94 (4)       | 97 (4) |
| <b>iii) Intermediate filaments</b>                           |           |                                                                                                          |         |               |          |              |        |
| 1.5-34                                                       |           | type II keratin K8 ( <i>Scyllorhinus stellaris</i> )                                                     | KRT8    |               | 55 (6)   | 99 (4)       | 99 (2) |
| <b>iv) Cytoskeleton anchoring</b>                            |           |                                                                                                          |         |               |          |              |        |
| 1.5-9                                                        |           | radixin                                                                                                  | RDX     | 51 (1)        | 120 (4)  | 92 (2)       | 97 (4) |
| 1.5-12                                                       |           | moesin/radixin                                                                                           | MSN     | 64 (2)        | 71 (3)   | 48 (1)       | 92 (4) |
| 1.5-13                                                       |           | similar to Moesin (Membrane-organizing extension spike protein)                                          | MSN     | 33 (1)        | 99 (6)   |              |        |
| <b>v) mitochondrial cristae structure</b>                    |           |                                                                                                          |         |               |          |              |        |
| 1.5-6                                                        |           | mitofilin (mitochondrial inner membrane protein) ( <i>Homo sapiens</i> )                                 | IMMT    | 52 (1)        | 70 (1)   | 91 (2)       | 90 (2) |
| <b>g) Signalling pathways</b>                                |           |                                                                                                          |         |               |          |              |        |
| <b>i) cAMP dependent protein kinase (PKA)</b>                |           |                                                                                                          |         |               |          |              |        |
| 1.5-31                                                       |           | cAMP-dependent protein kinase, regulatory subunit alpha 1 ( <i>Homo sapiens</i> )                        | PRKARIA | 212 (15)      |          | 99 (6)       |        |
| <b>ii) 14-3-3 mediated phosphoprotein adapter signalling</b> |           |                                                                                                          |         |               |          |              |        |
| 2-15                                                         |           | 14-3-3 epsilon                                                                                           | YWHAE   |               | 46 (7)   |              | 44 (2) |
| 1.5-51                                                       |           | 14-3-3 epsilon (tyrosine 3/tryptophan 5 -monoxygenase activation protein, epsilon polypeptide)           | YWHAE   | 378 (33)      | 138 (15) | 99 (9)       | 99 (8) |
| <b>iii) Oxygen sensing</b>                                   |           |                                                                                                          |         |               |          |              |        |
| VIP25                                                        | 1.43      | cystathionase ( <i>Danio rerio</i> )                                                                     | CTH     | 70 (3)        | 65 (3)   | 93 (2)       | 90 (1) |
| <b>h) ROS/oxidative stress</b>                               |           |                                                                                                          |         |               |          |              |        |
| 2-21                                                         | VIP01     | 2.02 glyoxalase domain containing 5                                                                      | GLOD5   | 62 (3)        | 69 (3)   |              | 96 (2) |
| 1.5-23                                                       |           | aldehyde dehydrogenase 4 family, member A1 ( <i>Danio rerio</i> )                                        | ALDH4A1 |               | 59 (2)   |              | 87 (2) |
| 1.5-26                                                       |           | aldehyde dehydrogenase 7 family, member A1                                                               | ALDH7A1 | 25 (1)        | 32 (1)   | 83 (3)       |        |
| 1.5-71                                                       |           | ferritin, heavy polypeptide                                                                              | FTH1    | 23 (7)        | 30 (7)   | 73 (2)       |        |
| 1.5-64                                                       |           | Parkinson disease 7 (DJ-1)                                                                               | PARK7   | 76 (7)        | 93 (7)   | 98 (3)       | 79 (3) |
| VIP20                                                        | 1.47      | Ubiquinone biosynthesis methyltransferase COQ5 (unnamed protein product, <i>Tetraodon nigroviridis</i> ) | COQ5    | 35 (4)        | 71 (4)   |              | 93 (3) |

Table S4. Expression ratios for epaulette shark cerebellum proteins that were regulated by episodic anoxia (A1+24) or hypoxia (H1+24; H1+H2+24) but that were not identified using mass spectrometry. Values in bold font met the statistical ( $p < 0.05$ ) and expression ratio ( $< 0.67$  or  $> 1.5$ ) criteria for mass spectrometry analysis in that treatment. Variable importance in the projection ranks (VIP) based on a partial least squares discriminant analysis are also presented.

| Spot   | VIP   | A1+24       | p            | H1+24       | p            | H1+H2+24    | p            |
|--------|-------|-------------|--------------|-------------|--------------|-------------|--------------|
| 2-1    | VIP02 | <b>0.55</b> | <b>0.006</b> | <b>0.46</b> | <b>0.001</b> | 0.69        | <b>0.037</b> |
| 2-3    |       | 0.92        | 0.798        | 0.79        | 0.484        | <b>0.35</b> | <b>0.031</b> |
| 2-8    | VIP37 | <b>0.41</b> | <b>0.029</b> | 0.54        | 0.088        | 0.70        | 0.260        |
| 2-10   |       | 0.97        | 0.744        | <b>0.47</b> | <b>0.004</b> | 0.65        | 0.053        |
| 2-11   |       | 0.56        | 0.111        | 0.68        | 0.387        | <b>0.41</b> | <b>0.026</b> |
| 2-12   |       | 1.29        | 0.269        | <b>1.81</b> | <b>0.015</b> | <b>2.21</b> | <b>0.006</b> |
| 2-13   |       | 0.92        | 0.812        | 0.51        | 0.236        | <b>0.30</b> | <b>0.041</b> |
| 1.5-16 |       | 0.87        | 0.352        | 1.28        | 0.153        | <b>1.67</b> | <b>0.019</b> |
| 1.5-17 |       | <b>0.51</b> | <b>0.033</b> | 0.85        | 0.478        | 0.85        | 0.580        |
| 1.5-19 |       | 1.10        | 0.718        | <b>1.75</b> | <b>0.012</b> | 1.77        | 0.066        |
| 1.5-21 |       | 1.04        | 0.893        | 1.25        | 0.461        | <b>0.53</b> | <b>0.047</b> |
| 1.5-22 | VIP30 | <b>1.98</b> | <b>0.029</b> | 1.46        | 0.256        | 1.16        | 0.469        |
| 1.5-24 |       | 1.68        | 0.148        | <b>1.74</b> | <b>0.022</b> | 1.48        | 0.086        |
| 1.5-46 |       | 1.17        | 0.588        | <b>0.58</b> | <b>0.045</b> | 0.75        | 0.331        |
| 1.5-49 |       | 0.83        | 0.107        | <b>0.67</b> | <b>0.031</b> | 0.68        | <b>0.019</b> |
| 1.5-53 |       | 0.91        | 0.570        | <b>0.64</b> | <b>0.040</b> | 0.90        | 0.567        |
| 1.5-57 | VIP13 | <b>1.50</b> | <b>0.025</b> | 1.48        | <b>0.049</b> | 1.16        | 0.406        |
| 1.5-59 |       | 1.09        | 0.696        | <b>0.57</b> | <b>0.015</b> | 1.70        | 0.461        |
| 1.5-60 |       | 0.79        | 0.261        | <b>0.61</b> | <b>0.044</b> | 0.61        | 0.051        |
| 1.5-61 | VIP14 | <b>0.56</b> | <b>0.021</b> | <b>0.62</b> | <b>0.011</b> | 0.75        | 0.061        |
| 1.5-63 |       | 0.93        | 0.677        | 0.70        | <b>0.013</b> | <b>0.55</b> | <b>0.004</b> |
| 1.5-65 |       | 1.01        | 0.957        | 0.88        | 0.570        | <b>0.50</b> | <b>0.007</b> |
| 1.5-67 |       | 0.67        | 0.269        | <b>0.52</b> | <b>0.026</b> | <b>0.57</b> | <b>0.012</b> |
| 1.5-68 |       | 1.26        | 0.492        | 1.46        | 0.051        | <b>1.65</b> | <b>0.020</b> |
| 1.5-69 |       | 0.88        | 0.322        | 1.33        | <b>0.028</b> | <b>1.72</b> | <b>0.023</b> |
|        | VIP05 | 1.16        | 0.398        | 1.29        | <b>0.022</b> | 0.70        | 0.113        |
|        | VIP07 | 0.79        | 0.073        | 0.69        | <b>0.032</b> | 1.02        | 0.766        |
|        | VIP10 | 0.83        | <b>0.048</b> | 0.84        | 0.062        | 0.78        | <b>0.006</b> |
|        | VIP11 | 0.71        | <b>0.001</b> | 0.82        | 0.163        | 0.82        | <b>0.023</b> |
|        | VIP12 | 0.84        | 0.219        | 1.25        | 0.188        | 0.81        | 0.130        |
|        | VIP17 | 0.81        | 0.094        | 0.83        | 0.329        | 1.20        | 0.081        |
|        | VIP18 | 0.84        | <b>0.048</b> | 0.64        | <b>0.000</b> | 0.81        | 0.061        |
|        | VIP20 | 0.85        | <b>0.023</b> | 0.75        | <b>0.006</b> | 0.82        | <b>0.031</b> |
|        | VIP22 | 0.83        | <b>0.046</b> | 0.77        | <b>0.028</b> | 0.93        | 0.481        |
|        | VIP24 | 1.15        | <b>0.035</b> | 0.95        | 0.616        | 1.18        | 0.182        |
|        | VIP25 | 0.88        | 0.632        | 1.37        | 0.114        | 0.84        | 0.461        |
|        | VIP32 | 1.40        | <b>0.030</b> | 0.96        | 0.721        | 0.90        | 0.437        |

| <b>Spot</b> | <b>VIP</b> | <b>A1+24</b> | <b>p</b> | <b>H1+24</b> | <b>p</b> | <b>H1+H2+24</b> | <b>p</b> |
|-------------|------------|--------------|----------|--------------|----------|-----------------|----------|
| VIP33       | 0.70       | 0.058        | 1.21     | 0.239        | 0.89     | 0.562           |          |
| VIP36       | 1.04       | 0.588        | 0.99     | 0.823        | 0.85     | <b>0.002</b>    |          |
| VIP38       | 1.05       | 0.775        | 1.27     | 0.099        | 0.87     | 0.357           |          |
| VIP39       | 1.25       | 0.173        | 1.52     | 0.077        | 0.99     | 0.928           |          |
| VIP40       | 0.99       | 0.865        | 0.90     | <b>0.021</b> | 0.80     | <b>0.009</b>    |          |
| VIP41       | 1.09       | 0.723        | 0.71     | 0.303        | 2.90     | 0.108           |          |
| VIP42       | 1.07       | 0.651        | 1.10     | 0.384        | 0.72     | 0.054           |          |
| VIP44       | 1.12       | 0.279        | 1.27     | 0.198        | 0.87     | 0.295           |          |
| VIP45       | 1.39       | 0.060        | 0.99     | 0.915        | 0.91     | 0.471           |          |
| VIP48       | 1.60       | 0.066        | 0.81     | 0.202        | 1.04     | 0.881           |          |
| VIP49       | 1.15       | 0.163        | 1.37     | 0.055        | 1.02     | 0.867           |          |

Table S5. Expression ratios for epaulette shark rectal gland proteins that were regulated by episodic anoxia (A1+24) or hypoxia (H1+24; H1+H2+24) but that were not identified using mass spectrometry. Values in bold font met the statistical ( $p < 0.05$ ) and expression ratio ( $< 0.67$  or  $> 1.5$ ) criteria for mass spectrometry analysis in that treatment. Variable importance in the projection ranks (VIP) based on a partial least squares discriminant analysis are also presented.

| Spot   | VIP   | A1+24       | p            | H1+24       | p            | H1+H2+24    | p            |
|--------|-------|-------------|--------------|-------------|--------------|-------------|--------------|
| 2-1    |       | 1.56        | 0.358        | <b>2.49</b> | <b>0.014</b> | <b>1.93</b> | <b>0.037</b> |
| 2-2    |       | <b>0.65</b> | <b>0.015</b> | <b>0.45</b> | <b>0.002</b> | 0.90        | 0.757        |
| 2-3    |       | 0.71        | 0.056        | <b>0.40</b> | <b>0.000</b> | 1.03        | 0.954        |
| 2-4    |       | 1.11        | 0.722        | <b>0.49</b> | <b>0.023</b> | 0.79        | 0.317        |
| 2-5    |       | 1.05        | 0.875        | <b>0.37</b> | <b>0.001</b> | 0.69        | 0.072        |
| 2-7    |       | 2.09        | 0.101        | <b>2.18</b> | <b>0.010</b> | <b>1.96</b> | <b>0.049</b> |
| 2-8    |       | 0.99        | 0.976        | <b>2.33</b> | <b>0.039</b> | 1.55        | 0.326        |
| 2-9    |       | 0.84        | 0.624        | <b>2.07</b> | <b>0.042</b> | 1.59        | 0.079        |
| 2-10   |       | 1.02        | 0.960        | <b>2.44</b> | <b>0.001</b> | 1.64        | 0.125        |
| 2-13   |       | 1.97        | 0.070        | <b>2.21</b> | <b>0.006</b> | 1.41        | 0.417        |
| 2-18   |       | 1.07        | 0.841        | <b>2.02</b> | <b>0.003</b> | 1.33        | 0.222        |
| 2-19   |       | 1.06        | 0.906        | <b>2.23</b> | <b>0.016</b> | 1.86        | 0.141        |
| 2-20   |       | 1.38        | 0.292        | <b>2.12</b> | <b>0.006</b> | 1.48        | 0.170        |
| 2-22   | VIP12 | 0.74        | 0.513        | <b>2.84</b> | <b>0.001</b> | 1.84        | 0.061        |
| 2-23   |       | 0.98        | 0.967        | <b>3.60</b> | <b>0.001</b> | <b>3.07</b> | <b>0.008</b> |
| 2-24   |       | 1.64        | 0.163        | <b>2.58</b> | <b>0.009</b> | <b>3.14</b> | <b>0.014</b> |
| 2-25   |       | 0.86        | 0.564        | <b>0.49</b> | <b>0.048</b> | 0.97        | 0.959        |
| 2-27   | VIP33 | <b>3.21</b> | <b>0.045</b> | 2.01        | 0.080        | 1.44        | 0.455        |
| 1.5-1  |       | 1.43        | 0.500        | <b>1.87</b> | <b>0.001</b> | <b>1.37</b> | <b>0.041</b> |
| 1.5-2  |       | 1.23        | 0.447        | <b>1.88</b> | <b>0.023</b> | <b>1.58</b> | <b>0.004</b> |
| 1.5-3  |       | 0.89        | 0.649        | <b>1.64</b> | <b>0.040</b> | 1.60        | 0.105        |
| 1.5-4  |       | 1.06        | 0.882        | <b>1.52</b> | <b>0.023</b> | 1.30        | 0.079        |
| 1.5-5  |       | 1.23        | 0.402        | 1.25        | 0.387        | <b>1.88</b> | <b>0.046</b> |
| 1.5-7  |       | 0.81        | 0.201        | <b>0.61</b> | <b>0.027</b> | 0.88        | 0.590        |
| 1.5-8  |       | 0.85        | 0.335        | <b>0.63</b> | <b>0.041</b> | 0.93        | 0.756        |
| 1.5-15 |       | 0.79        | 0.312        | <b>0.57</b> | <b>0.048</b> | 0.78        | 0.305        |
| 1.5-16 |       | 1.00        | 0.987        | <b>0.65</b> | <b>0.048</b> | 0.92        | 0.734        |
| 1.5-17 |       | 0.99        | 0.945        | <b>0.65</b> | <b>0.028</b> | 0.97        | 0.890        |
| 1.5-20 |       | 1.44        | 0.216        | 1.56        | 0.223        | <b>1.95</b> | <b>0.041</b> |
| 1.5-21 |       | 0.83        | 0.379        | <b>0.59</b> | <b>0.041</b> | 0.80        | 0.286        |
| 1.5-22 |       | 0.85        | 0.347        | <b>0.56</b> | <b>0.009</b> | 0.83        | 0.258        |
| 1.5-25 | VIP19 | 0.72        | 0.134        | <b>0.57</b> | <b>0.001</b> | <b>0.51</b> | <b>0.000</b> |
| 1.5-29 |       | 1.00        | 0.997        | <b>1.52</b> | <b>0.005</b> | 1.35        | 0.059        |
| 1.5-30 |       | 0.99        | 0.945        | <b>0.59</b> | <b>0.032</b> | 0.92        | 0.657        |
| 1.5-32 |       | 1.11        | 0.745        | 1.17        | 0.514        | <b>1.52</b> | <b>0.037</b> |

| Spot   | VIP   | A1+24       | p            | H1+24       | p            | H1+H2+24    | p            |
|--------|-------|-------------|--------------|-------------|--------------|-------------|--------------|
| 1.5-33 |       | 0.87        | 0.594        | <b>0.53</b> | <b>0.006</b> | 0.80        | 0.231        |
| 1.5-38 |       | <b>0.66</b> | <b>0.038</b> | 1.01        | 0.969        | 1.33        | 0.293        |
| 1.5-39 |       | <b>0.07</b> | <b>0.015</b> | 1.74        | 0.466        | <b>0.26</b> | <b>0.012</b> |
| 1.5-42 |       | 0.90        | 0.708        | <b>1.56</b> | <b>0.001</b> | 1.32        | 0.139        |
| 1.5-44 |       | <b>0.60</b> | <b>0.014</b> | 0.75        | 0.115        | 0.81        | 0.258        |
| 1.5-45 |       | 1.05        | 0.851        | <b>1.61</b> | <b>0.015</b> | 1.23        | 0.120        |
| 1.5-46 |       | 1.18        | 0.388        | <b>2.00</b> | <b>0.029</b> | 1.61        | 0.193        |
| 1.5-50 |       | 1.11        | 0.672        | <b>1.90</b> | <b>0.005</b> | 1.87        | 0.096        |
| 1.5-56 | VIP32 | 1.00        | 0.983        | <b>1.59</b> | <b>0.001</b> | <b>1.57</b> | <b>0.001</b> |
| 1.5-57 |       | 0.99        | 0.952        | <b>0.63</b> | <b>0.049</b> | 0.84        | 0.261        |
| 1.5-59 | VIP31 | 0.89        | 0.543        | <b>1.56</b> | <b>0.011</b> | 1.03        | 0.852        |
| 1.5-61 |       | 1.10        | 0.700        | 1.51        | 0.220        | <b>1.74</b> | <b>0.021</b> |
| 1.5-62 | VIP35 | 0.82        | 0.187        | <b>0.66</b> | <b>0.018</b> | 0.92        | 0.474        |
| 1.5-63 |       | 1.00        | 0.972        | <b>0.59</b> | <b>0.036</b> | 1.01        | 0.969        |
| 1.5-65 |       | 0.84        | 0.284        | <b>0.62</b> | <b>0.005</b> | <b>0.64</b> | <b>0.003</b> |
| 1.5-66 |       | 0.72        | 0.136        | 2.67        | 0.391        | <b>0.64</b> | <b>0.038</b> |
| 1.5-67 |       | 1.40        | 0.130        | <b>1.89</b> | <b>0.022</b> | 1.25        | 0.364        |
| 1.5-68 |       | 1.05        | 0.869        | <b>1.85</b> | <b>0.035</b> | 1.35        | 0.206        |
| 1.5-69 |       | 1.42        | 0.159        | <b>1.67</b> | <b>0.011</b> | 1.28        | 0.302        |
| 1.5-70 |       | 1.00        | 0.981        | <b>1.75</b> | <b>0.019</b> | 1.39        | 0.051        |
| 1.5-72 |       | <b>0.50</b> | <b>0.043</b> | <b>1.67</b> | <b>0.016</b> | 1.40        | 0.422        |
| 1.5-73 |       | 1.00        | 0.990        | <b>1.81</b> | <b>0.027</b> | 1.39        | 0.271        |
| 1.5-74 |       | <b>2.74</b> | <b>0.032</b> | <b>5.72</b> | <b>0.033</b> | <b>2.82</b> | <b>0.048</b> |
|        | VIP03 | 0.92        | 0.642        | 1.37        | <b>0.031</b> | 0.95        | 0.768        |
|        | VIP04 | 0.67        | <b>0.006</b> | 0.73        | <b>0.002</b> | 0.74        | <b>0.028</b> |
|        | VIP06 | 1.23        | <b>0.008</b> | 1.24        | <b>0.001</b> | 1.15        | <b>0.032</b> |
|        | VIP08 | 0.74        | <b>0.009</b> | 0.72        | <b>0.003</b> | 0.72        | <b>0.001</b> |
|        | VIP09 | 0.58        | 0.059        | 0.92        | 0.454        | 0.73        | <b>0.027</b> |
|        | VIP15 | 0.79        | <b>0.021</b> | 1.05        | 0.488        | 1.05        | 0.536        |
|        | VIP16 | 0.79        | <b>0.031</b> | 0.82        | <b>0.018</b> | 0.89        | 0.108        |
|        | VIP18 | 0.99        | 0.770        | 0.73        | <b>0.000</b> | 0.85        | 0.067        |
|        | VIP21 | 0.71        | <b>0.040</b> | 0.97        | 0.870        | 1.07        | 0.507        |
|        | VIP24 | 0.97        | 0.912        | 1.29        | 0.451        | 1.04        | 0.891        |
|        | VIP28 | 0.78        | 0.289        | 0.85        | 0.297        | 0.68        | 0.067        |
|        | VIP30 | 1.01        | 0.944        | 0.89        | 0.155        | 1.06        | 0.523        |
|        | VIP34 | 1.09        | 0.323        | 0.74        | <b>0.002</b> | 0.76        | <b>0.012</b> |
|        | VIP36 | 0.75        | <b>0.016</b> | 0.82        | 0.065        | 0.82        | 0.081        |
